# Supplementary material
Source: PubMed Central journal article supplement (PMC10460627)
Supplement: NIHMS1909175-supplement-MMC1.pdf [file NIHMS1909175-supplement-MMC1.pdf]

Figure S1

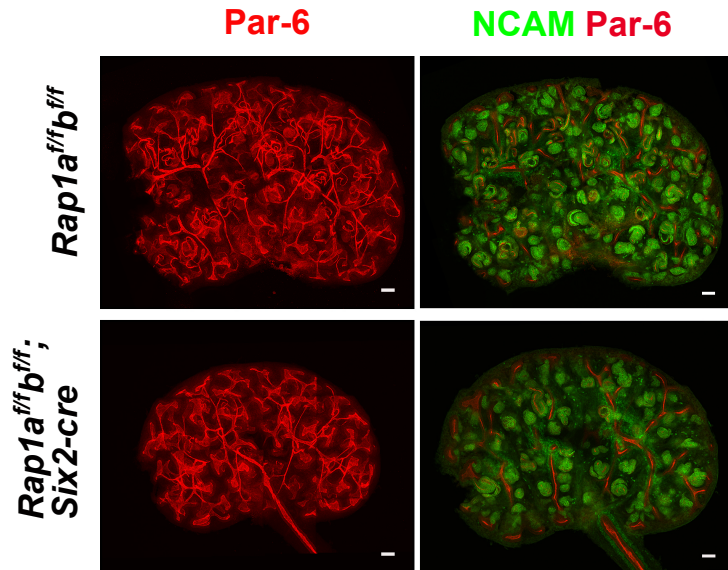

**Figure S1. Absence of Rap1 from developing nephron tubules results in luminal defects.** E14.5 control (Rap1<sup>af/f</sup>; Rap1<sup>bf/f</sup>) and mutant (Rap1<sup>af/f</sup>; Rap1<sup>bf/f</sup>; Six2-cre) kidneys were immunostained with Par-6 (red), which labels nephron lumens, and NCAM (green), which labels the plasma membrane of nephron progenitors and the basolateral plasma membrane of immature nephron epithelia. Scale: 200  $\mu$ m. These low magnification, confocal images of the E14.5 kidney are associated with Fig. 4C and with Movies 1a and 1b.
